# Supplementary material
Source: ML conference proceedings conference paper supplement (https://proceedings.mlr.press/v37/abbasi-yadkori15.html)
Supplement: Supplementary file 1 [file abbasi-yadkori15-supp.pdf]

## A. Average Losses

Lemma 4 in Appendix C motivates the following optimization problem:

$$\min_h v^\top (Lh - h), \quad (17)$$

where  $v$  is a distribution over the state space. If  $\hat{h}$  is an  $\epsilon$ -optimal solution, then

$$v^\top (L\hat{h} - \hat{h}) \leq v^\top (Lh - h) + \epsilon.$$

Thus, by Lemma 4 in Appendix C,

$$\lambda_{\pi_{\hat{h}}} + (v - \mu_{\pi_{\hat{h}}})^\top (L\hat{h} - \hat{h}) \leq \lambda_{\pi_h} + (v - \mu_{\pi_h})^\top (Lh - h) + \epsilon.$$

Thus, for any  $\hat{\lambda}$  and  $\lambda$ ,

$$\lambda_{\pi_{\hat{h}}} + (v - \mu_{\pi_{\hat{h}}})^\top (L\hat{h} - \hat{h} - \hat{\lambda}\mathbf{1}) \leq \lambda_{\pi_h} + (v - \mu_{\pi_h})^\top (Lh - h - \lambda\mathbf{1}) + \epsilon.$$

Thus,

$$\lambda_{\pi_{\hat{h}}} - \lambda_{\pi_h} \leq \|v - \mu_{\pi_{\hat{h}}}\|_1 \left\| L\hat{h} - \hat{h} - \hat{\lambda}\mathbf{1} \right\|_\infty + \|Lh - h - \lambda\mathbf{1}\|_{1,v} + \|Lh - h - \lambda\mathbf{1}\|_{1,\mu_{\pi_h}}.$$

Unfortunately, the optimization objective (17) is not convex.

## B. Proofs of Section 2

Before proving Theorem 1, we prove a useful lemma.

**Lemma 3.** *Let  $J : \mathcal{X} \rightarrow \mathbb{R}$  be a function. We have that*

$$J_{P_J}(x_1) - J(x_1) = \sum_{T \in \mathcal{T}} P_J(T) \sum_{x \in T} (LJ - J)(x).$$

*Proof.* We have that

$$\begin{aligned} \ell(x, P_J) &= q(x) + \sum_{x' \in \mathcal{X}} P_J(x, x') \log \frac{P_J(x, x')}{P_0(x, x')} \\ &= q(x) - \sum_{x' \in \mathcal{X}} P_J(x, x') J(x') - \log Z(x). \end{aligned} \quad (18)$$

By definition and (18),

$$J_{P_J}(x) = q(x) + \sum_{x' \in \mathcal{X}} P_J(x, x') (J_{P_J}(x') - J(x')) - \log Z(x).$$

Thus,

$$\begin{aligned} J_{P_J}(x) - J(x) &= q(x) + \sum_{x' \in \mathcal{X}} P_J(x, x') (J_{P_J}(x') - J(x')) - \log Z(x) - J(x) \\ &= (LJ - J)(x) + \sum_{x' \in \mathcal{X}} P_J(x, x') (J_{P_J}(x') - J(x')). \end{aligned}$$

Let  $f(x) = J_{P_J}(x) - J(x)$  and  $g(x) = (LJ - J)(x)$  so that  $f(x) = g(x) + \sum_{x' \in \mathcal{X}} P_J(x, x') f(x')$ . Because there are no loops and there exists an absorbing state such that  $(LJ - J)(z) = 0$ , we obtain the desired result:

$$J_{P_J}(x_1) - J(x_1) = \sum_{T \in \mathcal{T}} P_J(T) \sum_{x \in T} (LJ - J)(x).$$

□

*Proof of Theorem 1.* Because  $\hat{w} \in \mathcal{W}$ , by the positivity assumption below (7) we have that  $J_{\hat{w}}(x) \leq -\log g$  for any state  $x$ . Thus,

$$\begin{aligned} (LJ_{\hat{w}})(x) &= q(x) - \log \sum_{x'} P_0(x, x') e^{-J_{\hat{w}}(x')} \\ &\leq q(x) + \sum_{x'} P_0(x, x') \left( -\log e^{-J_{\hat{w}}(x')} \right) \\ &\leq Q - \log g. \end{aligned}$$

Thus, for any  $x$ ,

$$\max\{J_{\hat{w}}(x), (LJ_{\hat{w}})(x)\} \leq Q - \log g. \quad (19)$$

By the fact that  $\hat{w}$  is an  $\epsilon$ -optimal solution, for any  $w \in \mathcal{W}$ , we have

$$\begin{aligned} J_{\hat{w}}(x_1) + H \sum_{T \in \mathcal{T}} v(T) \sum_{x \in T} \left| \Psi(x, :)\hat{w} - e^{-q(x)} P_0(x, :)\Psi\hat{w} \right| &\leq \\ J_w(x_1) + H \sum_{T \in \mathcal{T}} v(T) \sum_{x \in T} \left| \Psi(x, :)\hat{w} - e^{-q(x)} P_0(x, :)\Psi\hat{w} \right| &+ \epsilon. \end{aligned}$$

Thus,

$$\begin{aligned} J_{\hat{w}}(x_1) + H e^{-Q + \log g} \sum_{T \in \mathcal{T}} v(T) \sum_{x \in T} |J_{\hat{w}}(x) - LJ_{\hat{w}}(x)| &\leq \\ J_w(x_1) + H \sum_{T \in \mathcal{T}} v(T) \sum_{x \in T} e^{-l_w(x)} |J_w(x) - LJ_w(x)| &+ \epsilon, \end{aligned}$$

where we used (9) and (19). Thus, by the choice of  $H$  and Lemma 3,

$$\begin{aligned} J_{P_{J_{\hat{w}}}}(x_1) + \sum_{T \in \mathcal{T}} (v(T) - P_{J_{\hat{w}}}(T)) \sum_{x \in T} |J_{\hat{w}}(x) - LJ_{\hat{w}}(x)| &\leq J_{P_{J_w}}(x_1) \\ + H \sum_{T \in \mathcal{T}} v(T) \sum_{x \in T} e^{-l_w(x)} |J_w(x) - LJ_w(x)| & \\ + \sum_{T \in \mathcal{T}} P_{J_w}(T) \sum_{x \in T} |J_w(x) - LJ_w(x)| &+ \epsilon. \end{aligned}$$

Thus,

$$\begin{aligned} J_{P_{J_{\hat{w}}}}(x_1) - J_{P_{J_w}}(x_1) &\leq \sum_{T \in \mathcal{T}} (P_{J_{\hat{w}}}(T) - v(T)) \sum_{x \in T} |J_{\hat{w}}(x) - LJ_{\hat{w}}(x)| \\ &+ H \sum_{T \in \mathcal{T}} v(T) \sum_{x \in T} e^{-l_w(x)} |J_w(x) - LJ_w(x)| \\ &+ \sum_{T \in \mathcal{T}} P_{J_w}(T) \sum_{x \in T} |J_w(x) - LJ_w(x)| + \epsilon \\ &\leq \|P_{J_{\hat{w}}} - v\|_1 \max_{T \in \mathcal{T}} \sum_{x \in T} |J_{\hat{w}}(x) - LJ_{\hat{w}}(x)| \\ &+ H \sum_{T \in \mathcal{T}} v(T) \sum_{x \in T} e^{-l_w(x)} |J_w(x) - LJ_w(x)| \\ &+ \sum_{T \in \mathcal{T}} P_{J_w}(T) \sum_{x \in T} |J_w(x) - LJ_w(x)| + \epsilon. \end{aligned}$$

□

**Input:** Starting state  $x_1$ , number of rounds  $N$ , a decreasing sequence of step sizes  $(\eta_t)$ , a positive  $v$  over states, estimate of optimal average cost  $b$ .  
 Let  $\Pi_{\mathcal{W}}$  be the Euclidean projection onto  $\mathcal{W}$ .  
 Initialize  $w_1 = \mathbf{0}$ .  
**for**  $t := 1, 2, \dots, N$  **do**  
     Sample state  $x \sim v/\|v\|_1$ .  
     Compute subgradient estimate  $r_t$  defined by (20).  
     Update  $w_{t+1} = \Pi_{\mathcal{W}}(w_t - \eta_t r_t)$ .  
**end for**  
 $\hat{w}_T = \frac{1}{T} \sum_{t=1}^T w_t$ .  
 Return policy  $P_{h_{\hat{w}_T}}$  defined in Section 3.

Figure 3. The Stochastic Subgradient Method for Average Cost Markov Decision Processes

### C. Algorithm and Proofs of Section 3

The stochastic subgradient algorithm for average cost MDPs is presented in Figure 3, where the stochastic subgradient of  $c(w)$  for a randomly sampled state  $x$  takes the following form,

$$r(w) = \|v\|_1 \text{sign} \left( e^{-b} \Psi(x, \cdot) w - e^{-q(x)} P_0(x, \cdot) \Psi w \right) \left( e^{-b} \Psi(x, \cdot) - e^{-q(x)} P_0(x, \cdot) \Psi \right). \quad (20)$$

Before proving Theorem 2, we prove a useful lemma.

**Lemma 4.** *Let  $h : \mathcal{X} \rightarrow \mathbb{R}$  be a bounded function and assume that the Markov chain induced by the greedy policy  $P_h$  is irreducible and aperiodic. Then, we have that*

$$\lambda_{P_h} = \mu_{P_h}^\top (Lh - h),$$

where  $\mu_{P_h}$  is the stationary distribution with respect to  $P_h$ .

*Proof.* The proof argument uses ideas from the proof of Theorem 8.4.1 in Puterman (1994). Let  $f(x) = (Lh)(x) - h(x)$ . We have that

$$P_h f = P_h \ell(\cdot, P_h) + P_h^2 h - P_h h = P_h \ell(\cdot, P_h) + P_h (P_h - I) h.$$

By repeating this argument, we get that  $P_h^s f = P_h^s \ell(\cdot, P_h) + P_h^s (P_h - I) h$ . Summing over  $s = 1 \dots t$ , we obtain

$$\sum_{s=1}^t P_h^s f = \sum_{s=1}^t P_h^s \ell(\cdot, P_h) + (P_h^t - I) h.$$

Averaging and taking the limit, we obtain

$$P_h^\infty f = \lim_{t \rightarrow \infty} \frac{1}{t} \sum_{s=1}^t P_h^s f = \lim_{t \rightarrow \infty} \frac{1}{t} \sum_{s=1}^t P_h^s \ell(\cdot, P_h) + \lim_{t \rightarrow \infty} \frac{1}{t} (P_h^t - I) h = \lambda_{P_h} \mathbf{1},$$

where we used  $\lambda_P \mathbf{1} = P^\infty \ell(\cdot, P)$  and boundedness of  $P_h^\infty h$ . Thus,  $\lambda_{P_h} = \mu_{P_h}^\top f$ .  $\square$

*Proof of Theorem 2.* For a differential value function  $h$ , let  $V = e^{-h}$ . We know that  $Lh = q - \log Z$  and  $Z(x) = \sum_{x'} P_0(x, x') e^{-h(x')} = \sum_{x'} P_0(x, x') V(x')$ . Then

$$e^{-Lh} - e^{-h-b} = e^{-q+\log Z} - e^{-h-b} = e^{-q} P_0 V - e^{-b} V.$$

Let  $\hat{w}$  be an  $\epsilon$ -optimal solution, then for any  $w \in \mathcal{W}$ , we have,

$$v^\top \left| e^{-q} P_0 \Psi \hat{w} - e^{-b} \Psi \hat{w} \right| \leq v^\top \left| e^{-q} P_0 \Psi w - e^{-b} \Psi w \right| + \epsilon.$$

Recall that  $h_{\hat{w}} = -\log \Psi \hat{w}$ . Let  $u_{\hat{w}} = \max(Lh_{\hat{w}}, h_{\hat{w}} + b)$  and  $l_w = \min(Lh_w, h_w + b)$ . By (9),

$$(e^{-u_{\hat{w}}} \odot v)^\top |Lh_{\hat{w}} - h_{\hat{w}} - b| \leq (e^{-l_w} \odot v)^\top |Lh_w - h_w - b| + \epsilon .$$

By Lemma 4, we have

$$\lambda_{P_{h_{\hat{w}}}} - b \leq \mu_{P_{h_{\hat{w}}}}^T |Lh_{\hat{w}} - h_{\hat{w}} - b| ,$$

which further implies that,

$$-b + \lambda_{P_{h_{\hat{w}}}} + (e^{-u_{\hat{w}}} \odot v - \mu_{P_{h_{\hat{w}}}})^\top |Lh_{\hat{w}} - h_{\hat{w}} - b| \leq (e^{-l_w} \odot v)^\top |Lh_w - h_w - b| + \epsilon .$$

This gives the performance bound in the theorem,

$$\begin{aligned} \lambda_{P_{h_{\hat{w}}}} - \lambda_{P_{h_w}} &\leq |b - \lambda_{P_{h_w}}| + \|(e^{-u_{\hat{w}}} \odot v - \mu_{P_{h_{\hat{w}}}})\|_1 \|Lh_{\hat{w}} - h_{\hat{w}} - b\|_\infty \\ &\quad + \|(Lh_w - h_w - b)\|_{1, (e^{-l_w} \odot v)} + \epsilon. \end{aligned}$$

□
